# Supplementary material
Source: PubMed Central journal article supplement (PMC7657968)
Supplement: NIHMS1625339-supplement-Supplemental_Digital_Content_4.pdf [file NIHMS1625339-supplement-Supplemental_Digital_Content_4.pdf]

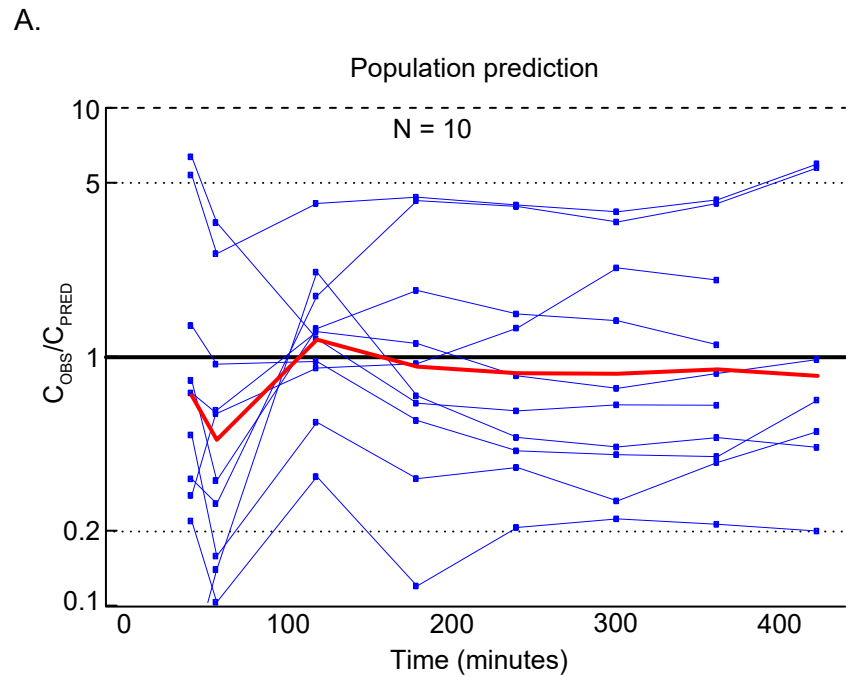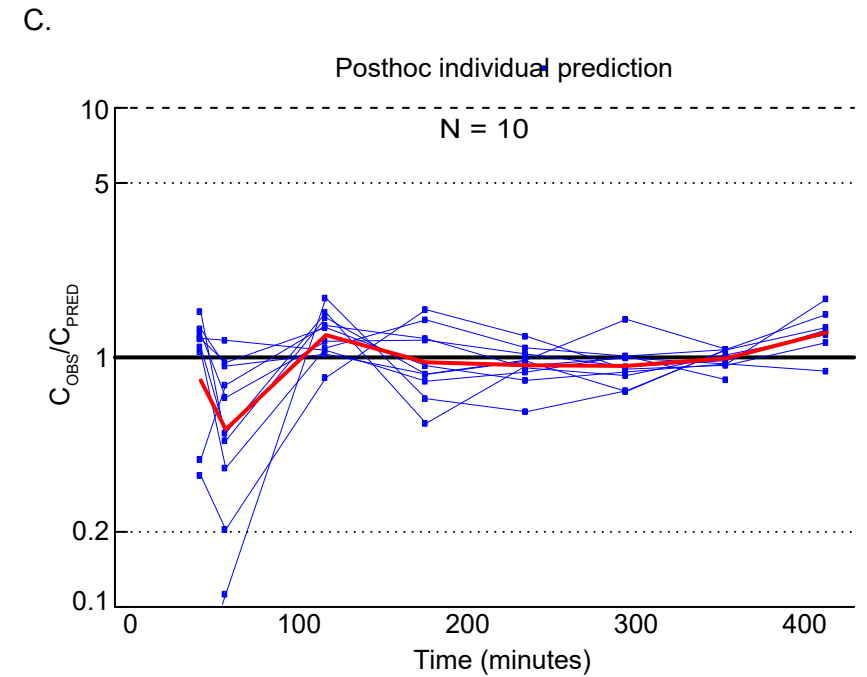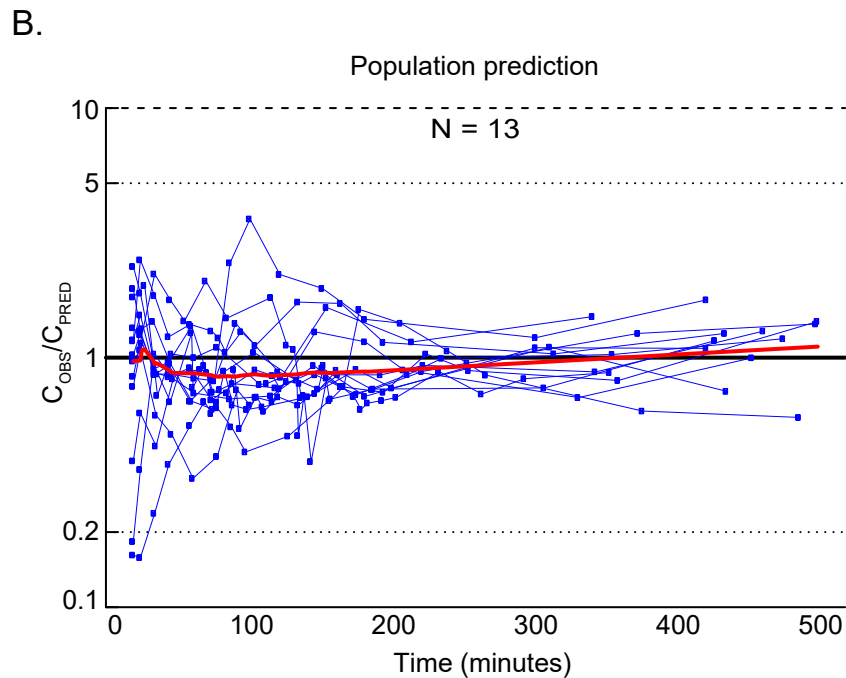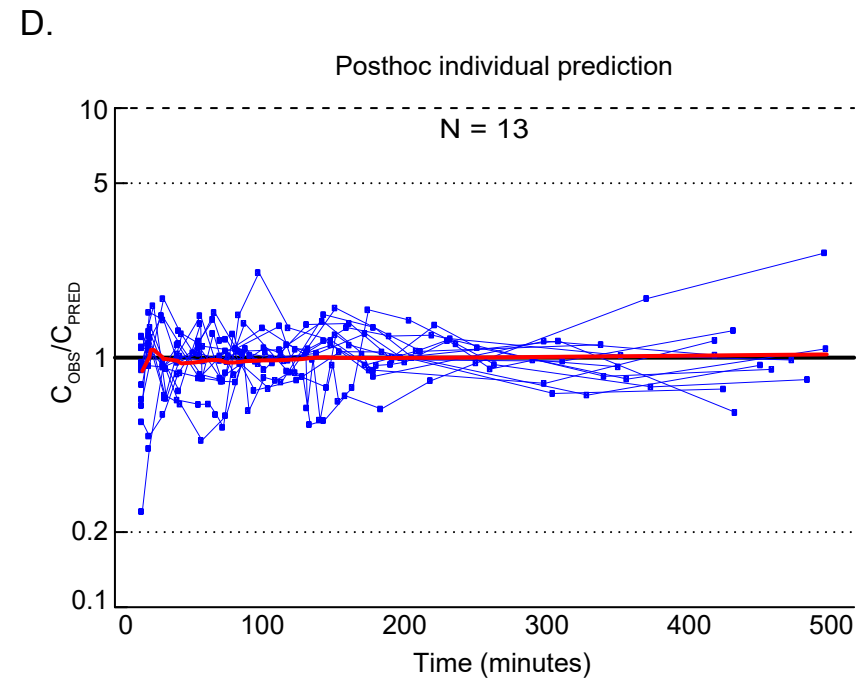

Goodness-of-fit plots. (A) Population observed/predicted and (C) Post hoc individual observed/predicted dexmedetomidine concentrations versus time for our oral dexmedetomidine study group data ( $n=10$ ). (B) Population observed/predicted and (D) Post hoc individual observed/predicted dexmedetomidine concentrations versus time for pooled intravenous dexmedetomidine study group ( $n=13$ ).  $C_{OBS}$  = observed plasma concentration;  $C_s$  = population predicted plasma concentration. Each blue line represents a subject. The red line represent the smoother (loess) for all patients. Black line shows the perfect fit.
