# Supplementary material
Source: PubMed Central journal article supplement (PMC7657968)
Supplement: NIHMS1625339-supplement-Supplemental_Digital_Content_5.pdf [file NIHMS1625339-supplement-Supplemental_Digital_Content_5.pdf]

A.

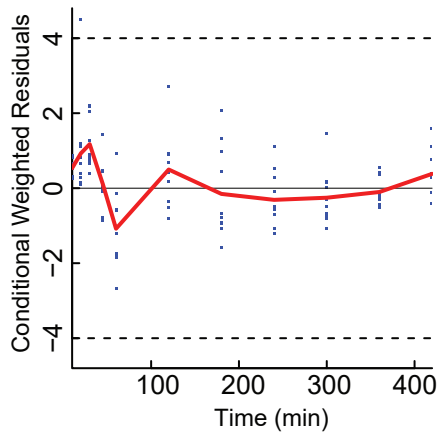

C.

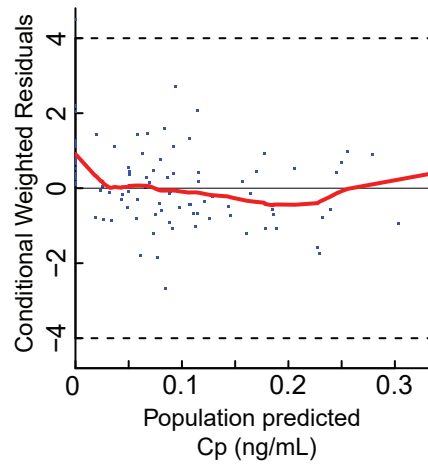

E.

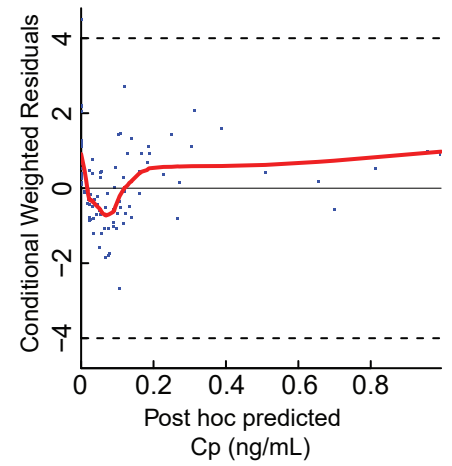

B.

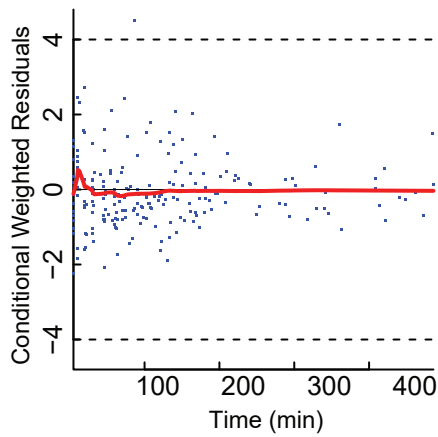

D.

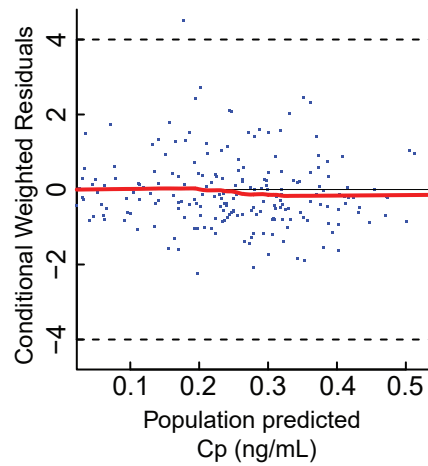

F.

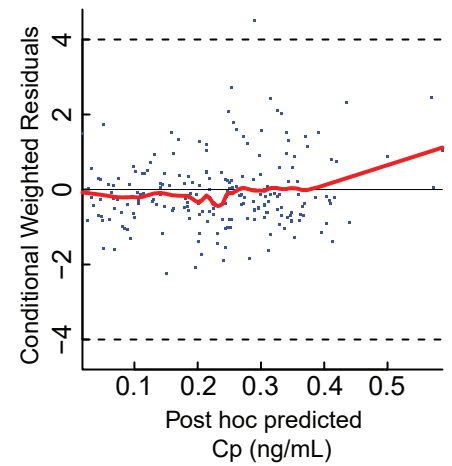

Conditional Weighted Residual (CWRES) goodness-of-fit plots. Conditional Weighted Residual versus (A) time, (C) Population predicted, and (E) Post hoc predicted for our oral dexmedetomidine study group (n=10). Conditional Weighted Residual versus (B) time, (D) Population predicted, and (F) Post hoc predicted for pooled intravenous dexmedetomidine study group (n=13). Blue points represents the CWRES distribution. The red line is a super smoother (loess) for all patients. The horizontal black line at  $y=0$  represents a perfect fit. In the plots, the CWRES are homogeneously distributed above and below the horizontal line at  $y=0$ .
