# Supplementary material
Source: PubMed Central journal article supplement (PMC7657968)
Supplement: NIHMS1625339-supplement-Supplemental_Digital_Content_8.pdf [file NIHMS1625339-supplement-Supplemental_Digital_Content_8.pdf]

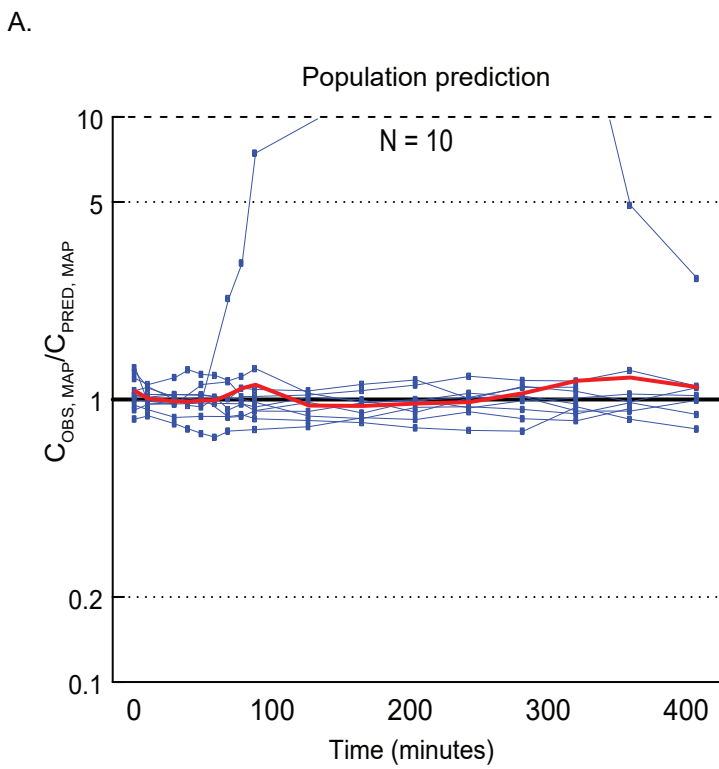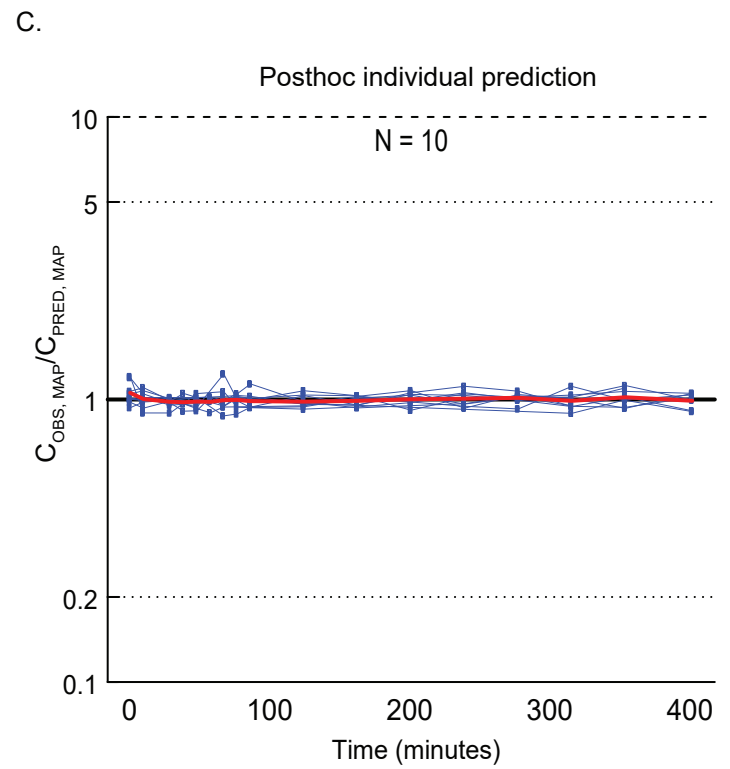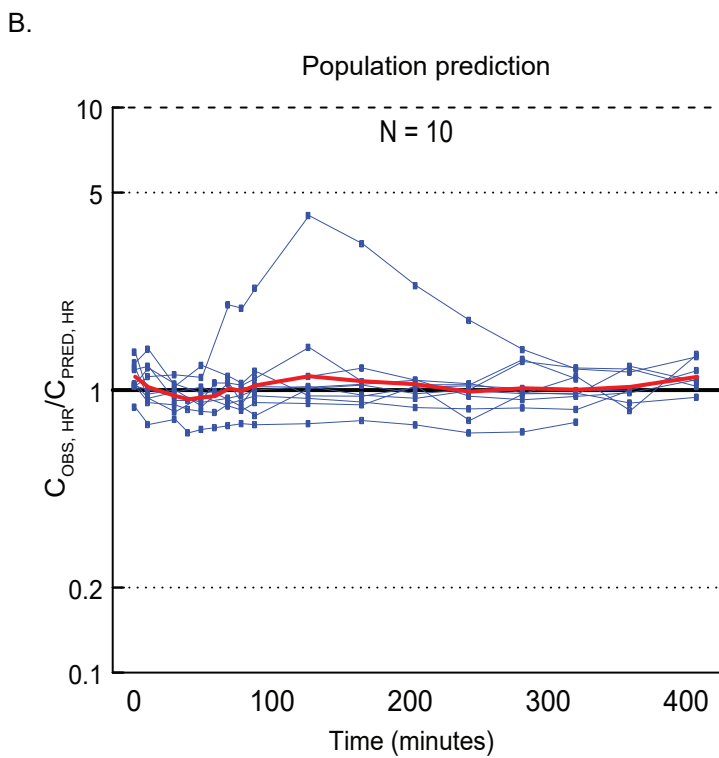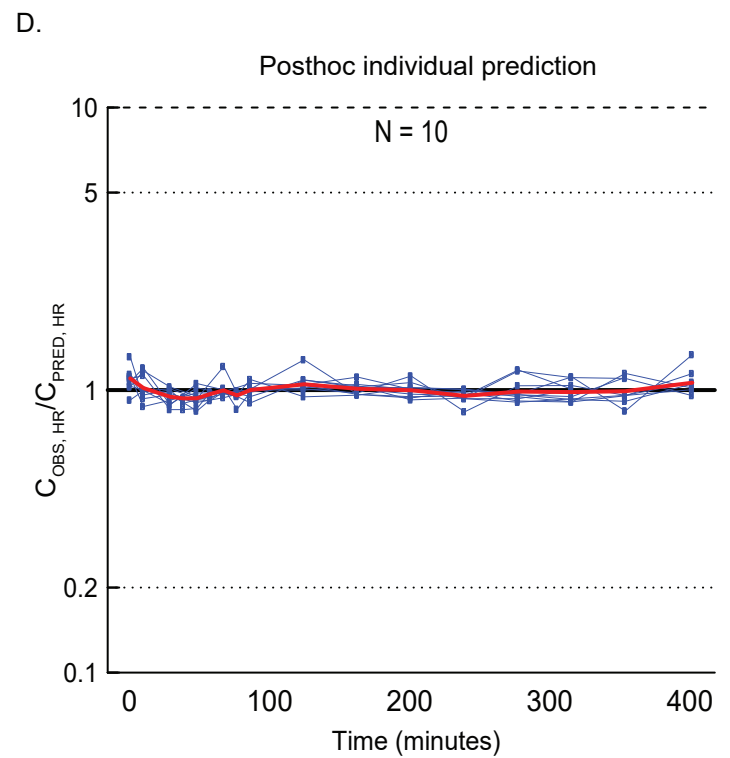

Goodness-of-fit plots. (A) Population observed/predicted and (C) Post hoc individual observed/predicted mean arterial pressure versus time for our oral dexmedetomidine study group data (n=10). (B) Population observed/predicted and (D) Post hoc individual observed/predicted heart rate versus time for pooled intravenous dexmedetomidine study group (n=13).  $C_{OBS, MAP}$  = observed mean arterial pressure;  $C_{PRED, MAP}$  = population predicted mean arterial pressure.  $C_{OBS, HR}$  = observed heart rate;  $C_{PRED, HR}$  = population predicted heart rate. Each blue line represents a subject. The red line represent the smoother (loess) for all patients. Black line shows the perfect fit.
