# Supplementary material
Source: PubMed Central journal article supplement (PMC7657968)

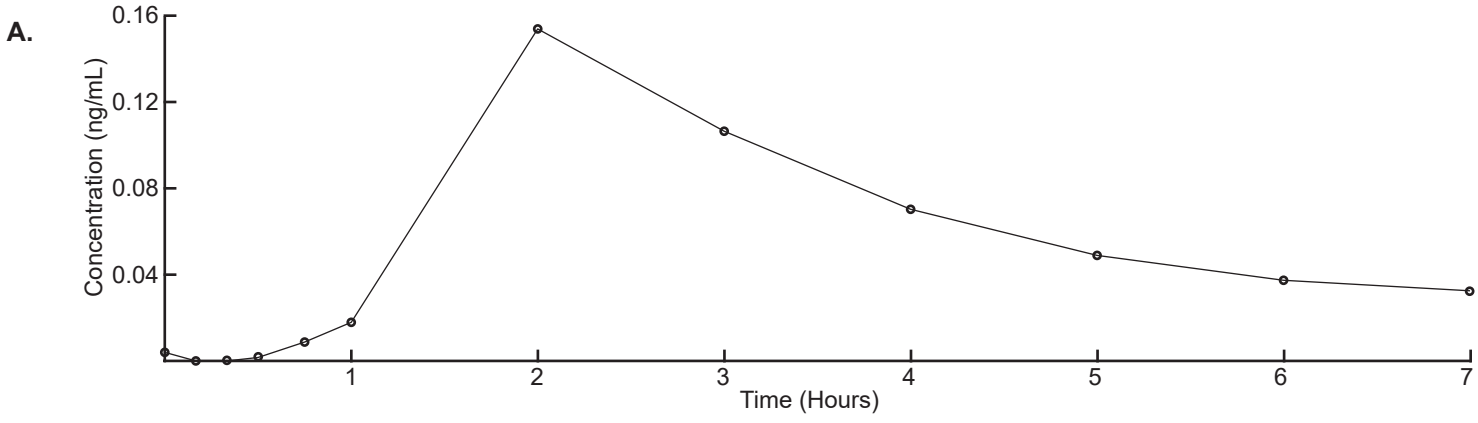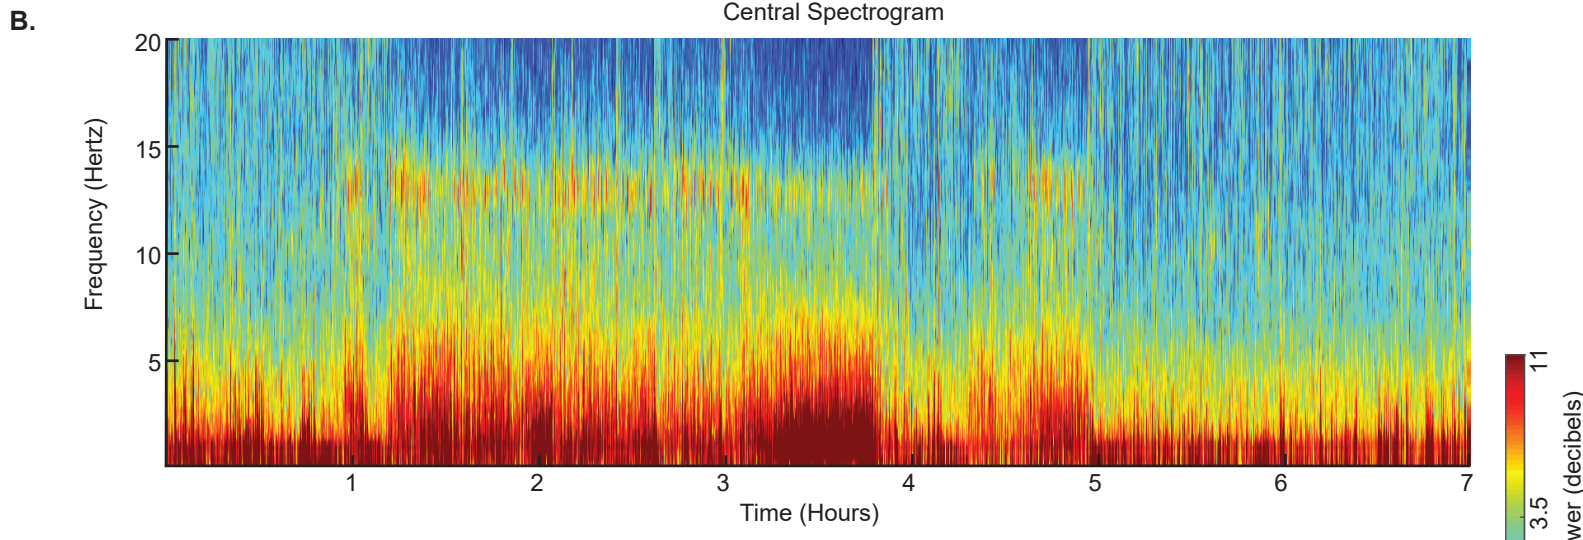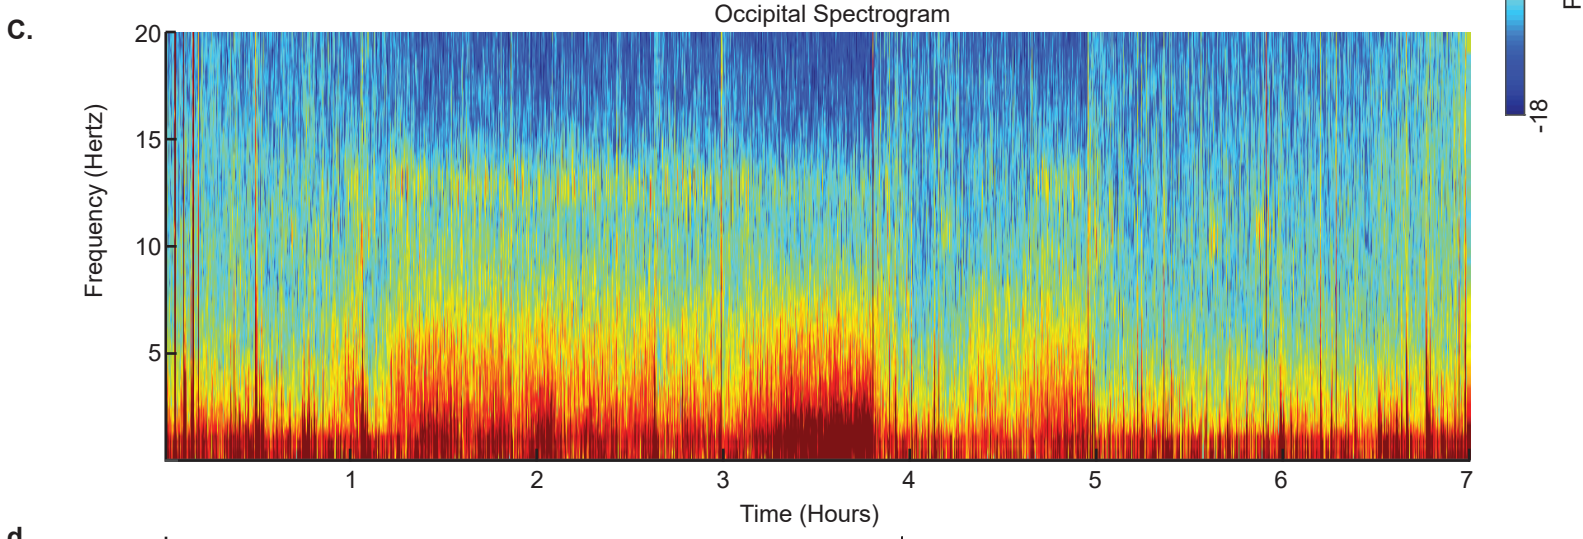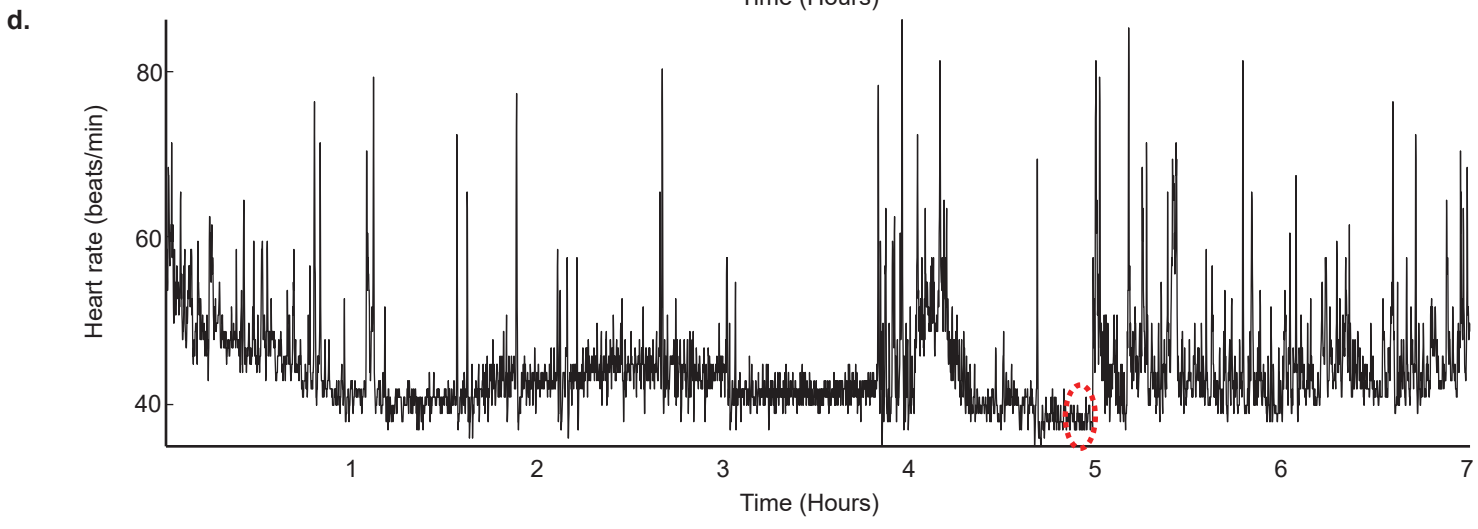

Supplement: NIHMS1625339-supplement-Supplemental_Digital_Content_2.pdf [file NIHMS1625339-supplement-Supplemental_Digital_Content_2.pdf]

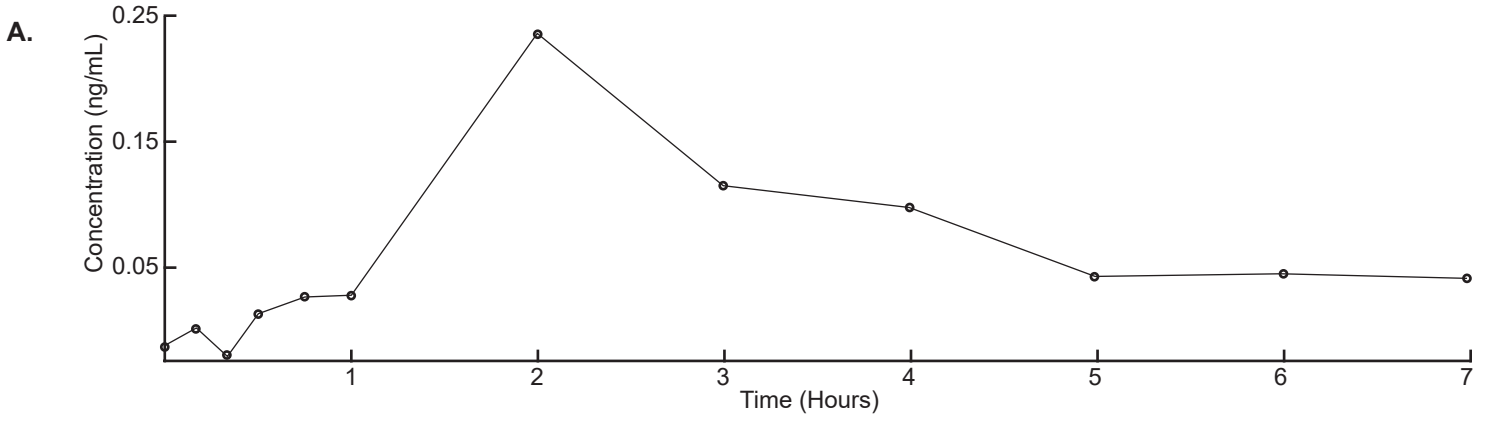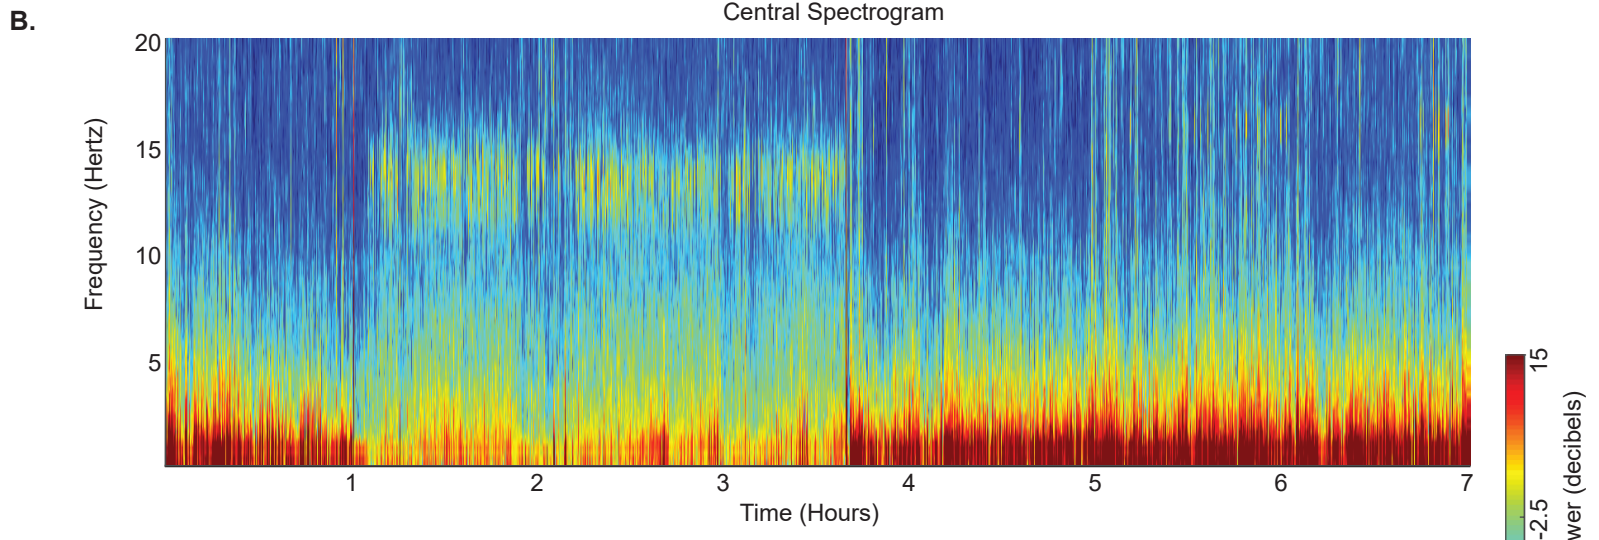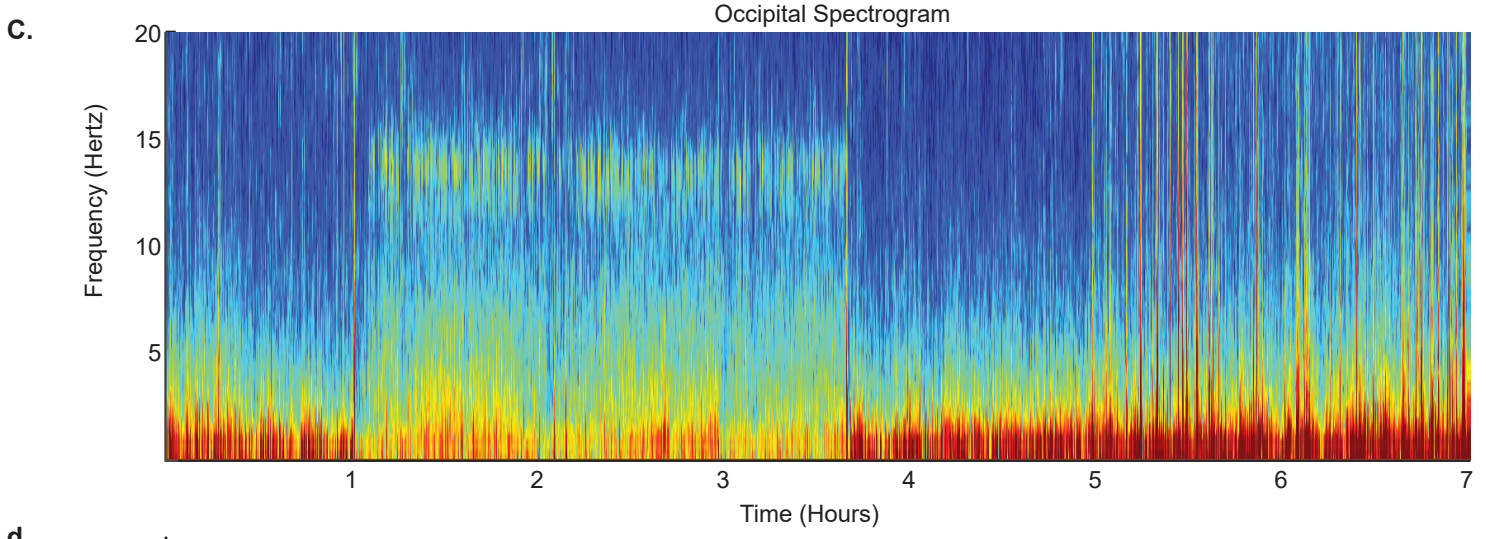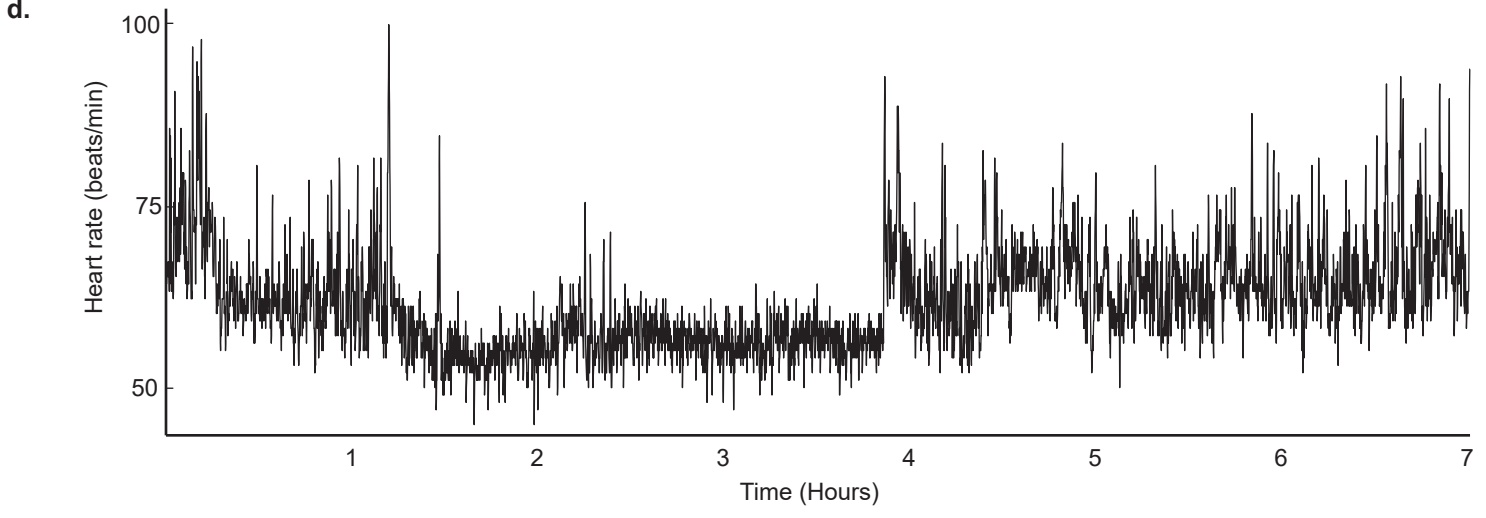

Supplement: NIHMS1625339-supplement-Supplemental_Digital_Content_3.pdf [file NIHMS1625339-supplement-Supplemental_Digital_Content_3.pdf]
